# Supplementary material for: Investigation of Surface Exploration Programs for Hydrological, Hydrogeological and Hydrogeochemical Issues in the Site Selection Procedure
Source: Copernicus journal article supplement (doi:10.5194/sand-1-57-2021), 2021-11-10
Supplement: Supplementary file 1 [file sand-1-57-2021-supplement.pdf]

Supplement of Saf. Nucl. Waste Disposal, 1, 57–58, 2021  
<https://doi.org/10.5194/sand-1-57-2021-supplement>  
© Author(s) 2021. CC BY 4.0 License.

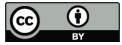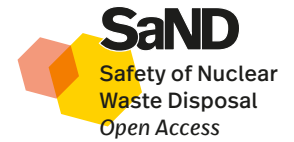

*Supplement of*

## **Investigation of Surface Exploration Programs for Hydrological, Hydrogeological and Hydrogeochemical Issues in the Site Selection Procedure**

**Kirsten Haneke et al.**

*Correspondence to:* Kirsten Haneke (k.haneke@brenk.com)

The copyright of individual parts of the supplement might differ from the article licence.

# Project „übErStand“: Investigation of surface exploration programmes for hydrological, hydrogeological and hydrogeochemical issues in the site selection procedure

BASE-project: FKZ 4717F01201

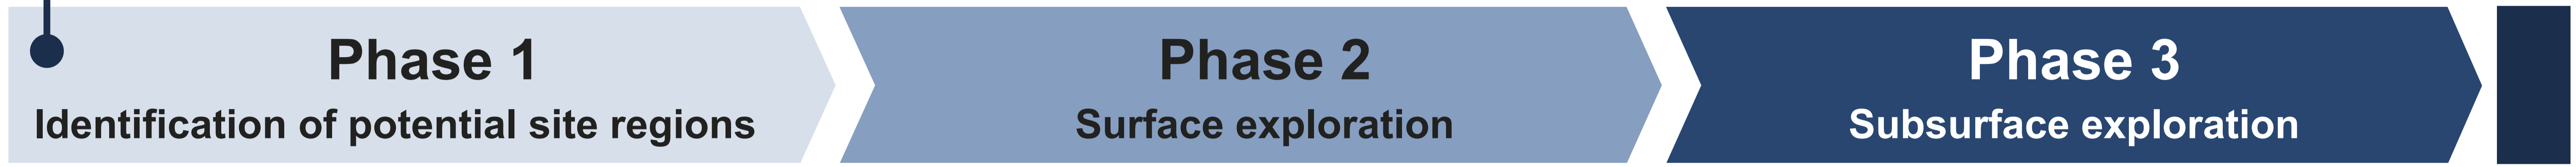

## Step 1 Derivation of relevant parameters for surface exploration methods from the StandAG

- ✓ Systematic presentation and explanation of the specific criteria and requirements related to hydrology, hydrogeology or hydrochemistry from the StandAG.
- ✓ Derivation of relevant parameters for determination by surface exploration methods.
- ✓ Comprehensive compilation of parameters related to hydrology, hydrogeology and hydrochemistry for surface exploration of the three host rocks.

### Fluid motion and transport relevant rock properties

sorption  
E<sub>h</sub>  
pH  
major and trace elements  
ionic strength  
viscosity  
density  
isotopic ratio  
conductivity/salinity  
colloids

transmissivity  
flow velocity  
hydraulic gradient  
diffusion  
tortuosity  
porosity  
consolidation (clay)

### Hydrochemistry

## Geohydraulic methods

## Surface geophysical exploration methods

## Borehole geophysical exploration methods

## Laboratory tests, field tests

## Step 2

### Description of exploration methods used to determine identified parameters

- ✓ Elaboration of the relevant and suitable surface exploration methods according to the current state of the art in science and technology.
- ✓ Description of ranges, reproducibilities, detection limits, advantages and disadvantages and possible combinations with other methods.
- ✓ Consideration of the three different host rocks.
- ✓ Allocation of the "most suitable" exploration methods to all relevant parameters for surface exploration programs at siting regions (generic).

## Step 3

### Classification and derivation of an orientation framework

- ✓ Requirements for complete documentation and quality assurance.
- ✓ Criteria for evaluating the quality and quantity of measured values and the results.
- ✓ Factors influencing the criteria for selecting suitable measurement methods for determining the measured quantities in accordance with the StandAG.
- ✓ Factors influencing the criteria for selection of suitable measurement densities and measurement intervals.

### Parameters to measure

Measuring methods

Sequence, necessity, ...

Measuring density

Host rock dependence, ...

Measuring intervals

Quality vs. quantity, ...

Gradual adaptation to site conditions and available data

**Orientation framework:**  
Evaluation of proposals for the surface exploration of site regions

#### Authors

K. Haneke, M.Sc.<sup>1</sup>  
Dr.-Ing. J. B. Pateiro Fernández<sup>1</sup>  
M. Goldsworthy, M.Sc.<sup>1</sup>  
Dr.-Ing. C. Pieper<sup>2</sup>  
Dr.-Ing. B. Starke<sup>2</sup>  
Dr. A. Schuck<sup>3</sup>  
Dr. C. Borkel<sup>4</sup>

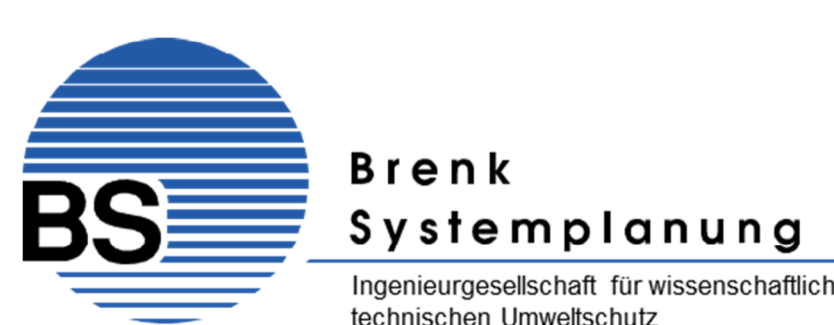

<sup>1</sup>Brek Systemplanung GmbH

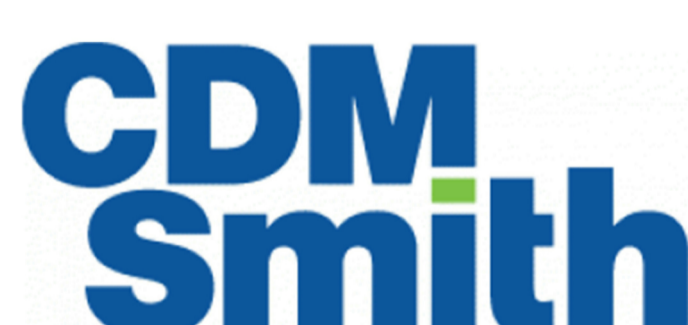

<sup>2</sup>CDM Smith Consult GmbH

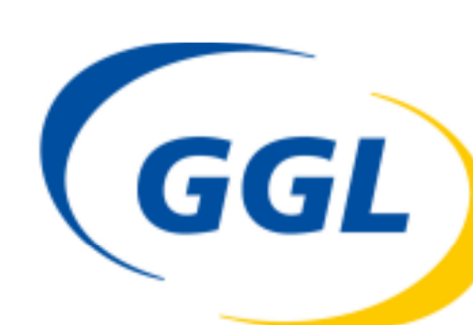

<sup>3</sup>GGL Geophysik und Geotechnik Leipzig GmbH

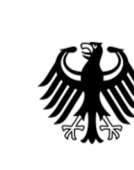

Federal Office for the Safety of Nuclear Waste Management

<sup>4</sup>Federal Office for the Safety of Nuclear Waste Management

on behalf of the

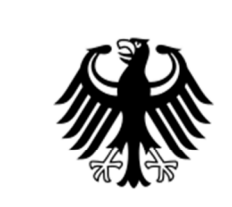

Federal Office for the Safety of Nuclear Waste Management

#### Disclaimer

The project übErStand was commissioned by the Federal Office for the Safety of Nuclear Waste Management (BASE) (FKZ 4717F01201). The content of this poster reflects the view and opinion of the contractor and does not necessarily correspond to the opinion of the BfE.
